# Supplementary figures and images for: Short-term early exposure to thirdhand cigarette smoke increases lung cancer incidence in mice
Source: Oxford University Press journal article supplement (doi:10.1042/cs20171521), 2018-02-13

Figure S1

A

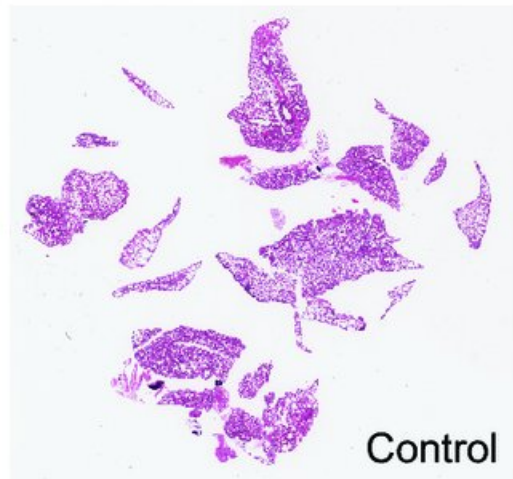

B

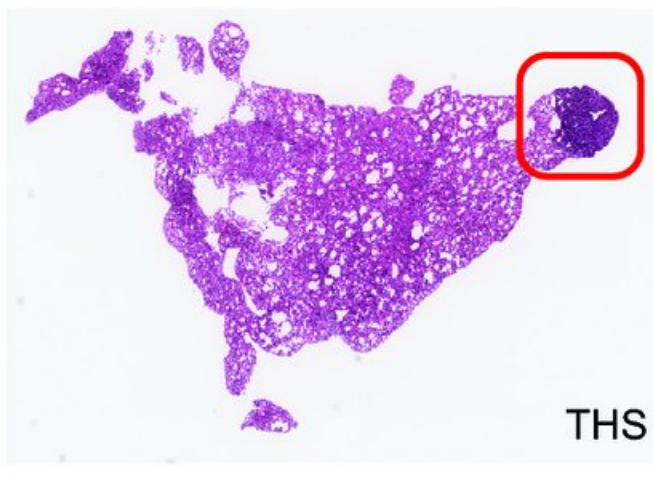

Figure S2

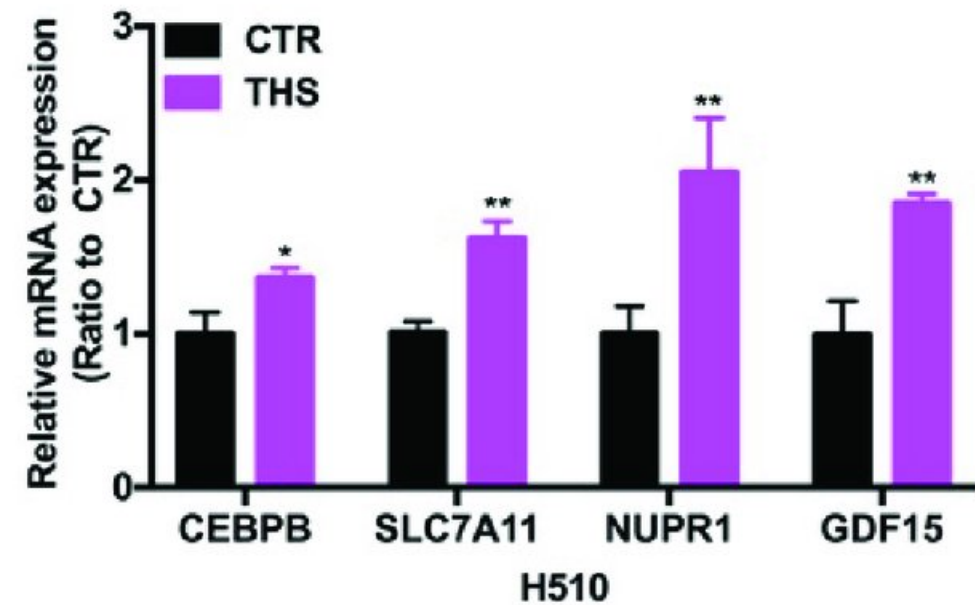

Figure S3

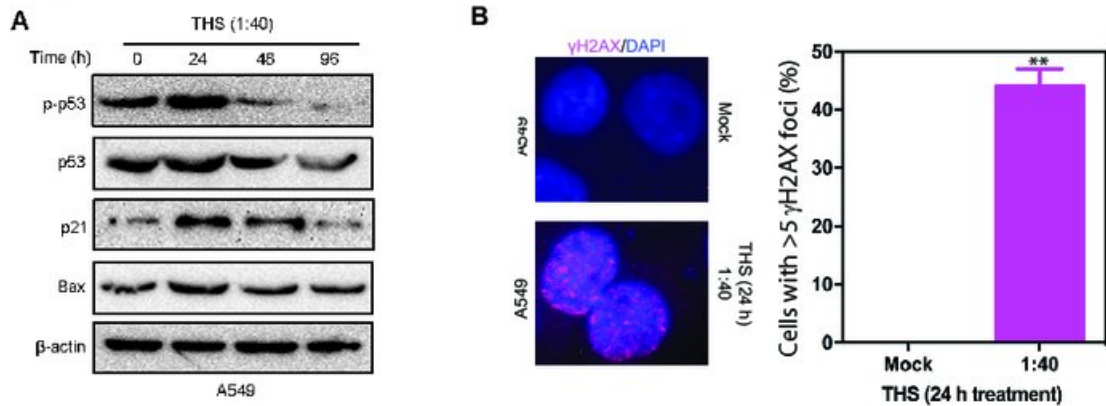

Figure S4

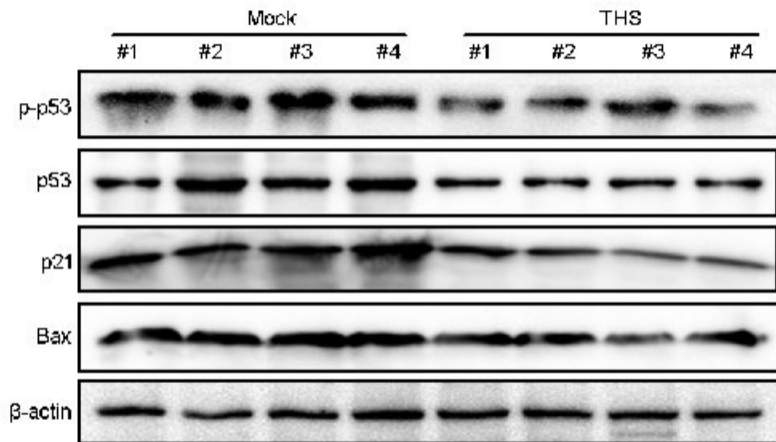

Mouse lung tissues

Figure S5

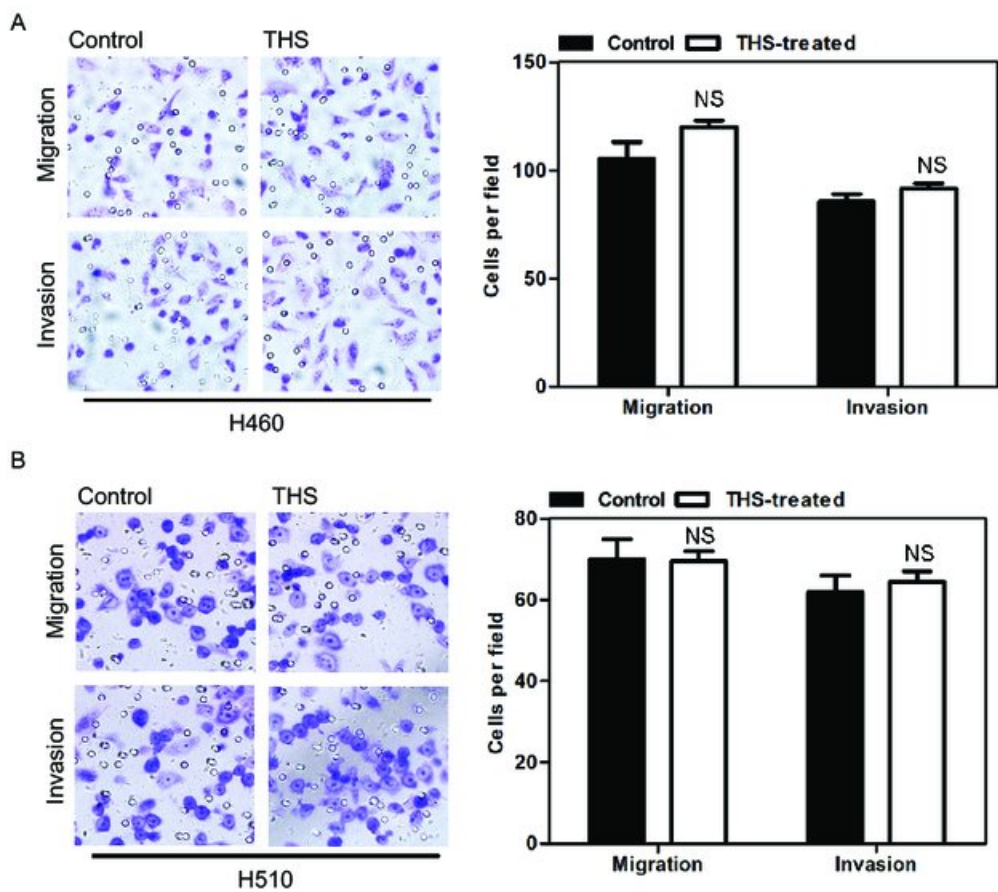

Supplement: cs20171521_supp1.pdf [file cs20171521_supp1.pdf]
